# Supplementary material for: Prognostic stromal gene signatures in breast cancer
Source: PubMed Central journal article supplement (PMC4360948; doi:10.1186/s13058-015-0530-2), 2015-02-21
Supplement: 13058_2015_530_MOESM1_ESM.pdf [file 13058_2015_530_MOESM1_ESM.pdf]

**Supplementary Table S1.** Basic patient and tumor characteristics of the breast cancer TCGA cohort used for the analyses.

|                             |                 |                |                 |                |                |
|-----------------------------|-----------------|----------------|-----------------|----------------|----------------|
| <b>Age</b>                  | <b>Median</b>   | <b>Range</b>   |                 |                |                |
|                             | 58              | 26-90          |                 |                |                |
| <b>Menopause</b>            | <b>Pre-</b>     | <b>Post-</b>   | <b>Peri-</b>    | <b>Missing</b> |                |
|                             | 117             | 337            | 14              | 36             |                |
| <b>Stage</b>                | <b>Stage 1</b>  | <b>Stage 2</b> | <b>Stage 3</b>  | <b>Stage 4</b> | <b>Missing</b> |
|                             | 88              | 299            | 98              | 6              | 13             |
| <b>Tumor stage</b>          | <b>T1</b>       | <b>T2</b>      | <b>T3</b>       | <b>T4</b>      | <b>Tx</b>      |
|                             | 140             | 293            | 56              | 12             | 3              |
| <b>Node stage</b>           | <b>N0</b>       | <b>N1</b>      | <b>N2</b>       | <b>N3</b>      | <b>Missing</b> |
|                             | 252             | 144            | 51              | 27             | 30             |
| <b>Metastasis stage</b>     | <b>M0</b>       | <b>M1</b>      | <b>Mx</b>       | <b>Missing</b> |                |
|                             | 443             | 6              | 55              | 2              |                |
|                             | <b>Positive</b> |                | <b>Negative</b> |                | <b>Missing</b> |
| <b>Estrogen receptor</b>    | 362             |                | 120             |                | 22             |
| <b>Progesteron receptor</b> | 315             |                | 164             |                | 25             |
| <b>HER2 (immuno)</b>        | 50              |                | 254             |                | 200            |
| <b>HER2 (FISH)</b>          | 21              |                | 151             |                | 332            |
