# Supplementary material for: Prognostic stromal gene signatures in breast cancer
Source: PubMed Central journal article supplement (PMC4360948; doi:10.1186/s13058-015-0530-2), 2015-02-21
Supplement: 13058_2015_530_MOESM2_ESM.pdf [file 13058_2015_530_MOESM2_ESM.pdf]

## Supplementary Table S2. RNA integrity and concentrations after membrane mounting

|                                 | Extracted RNA |     |               |         |
|---------------------------------|---------------|-----|---------------|---------|
|                                 | Bioanalyzer   |     | Nanodrop      |         |
|                                 | (ng/ $\mu$ l) | RIN | (ng/ $\mu$ l) | 260/280 |
| Tissue mounted with 30% ethanol | 142           | 3.7 | 161           | 2.10    |
| Non-mounted tissue              | 270           | 3.0 | 259           | 2.09    |
