# Supplementary material for: Prognostic stromal gene signatures in breast cancer
Source: PubMed Central journal article supplement (PMC4360948; doi:10.1186/s13058-015-0530-2), 2015-02-21
Supplement: 13058_2015_530_MOESM3_ESM.pdf [file 13058_2015_530_MOESM3_ESM.pdf]

### Supplementary Table S3. RNA integrity after cresyl violet staining

#### Extracted RNA

##### Bioanalyzer

##### Nanodrop

| Staining             | (ng/ $\mu$ l) | RIN | (ng/ $\mu$ l) | 260/280 |
|----------------------|---------------|-----|---------------|---------|
| Unstained            | 270           | 3.0 | 259           | 2.09    |
| Cresyl violet        | 142           | 3.7 | 161           | 2.10    |
| Cresyl violet + DEPC | 59.0          | 4.2 | 73.0          | 2.14    |
