# Supplementary material for: Prognostic stromal gene signatures in breast cancer
Source: PubMed Central journal article supplement (PMC4360948; doi:10.1186/s13058-015-0530-2), 2015-02-21
Supplement: 13058_2015_530_MOESM4_ESM.pdf [file 13058_2015_530_MOESM4_ESM.pdf]

## Supplementary Figure S1.

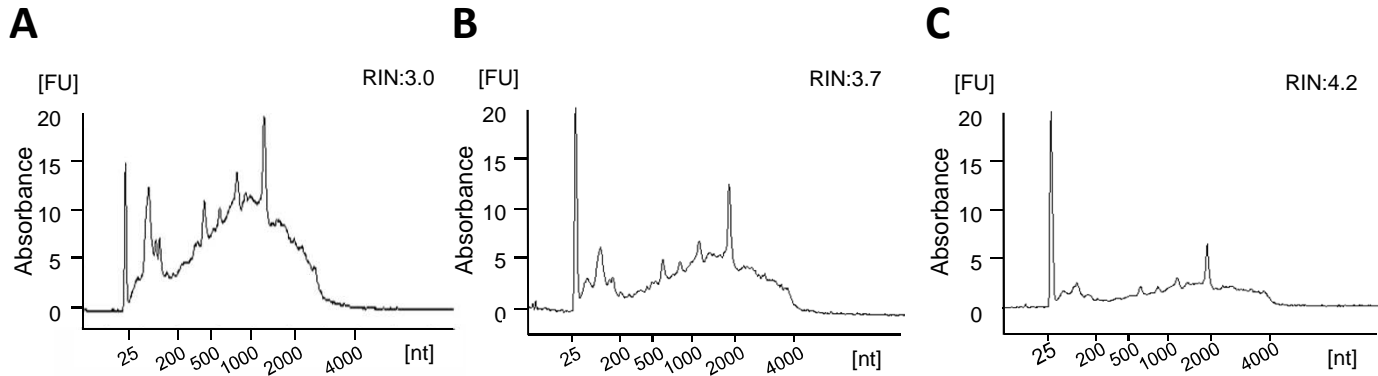

**RNA integrity is maintained after cresyl violet staining.** Electropherogram profiles of RNA from total non-mounted tissue (A), cresyl violet-stained mounted tissue with (B) and without aqueous rinsing steps (C). RNA length is indicated on the x-axis and y-axis corresponds to the fluorescence units. RIN values are calculated according to a standardized algorithm using various features correlated to RNA integrity.
