# Supplementary material for: Prognostic stromal gene signatures in breast cancer
Source: PubMed Central journal article supplement (PMC4360948; doi:10.1186/s13058-015-0530-2), 2015-02-21
Supplement: 13058_2015_530_MOESM5_ESM.pdf [file 13058_2015_530_MOESM5_ESM.pdf]

**Supplementary Table S4.** Genes enriched in stroma compartment, identified using the limma package in R. The magnitude of enrichment is indicated by the difference in log<sub>2</sub> expression (logFC).

|    | Symbol    | logFC | adj.P.value |    | Symbol   | logFC | adj.P.value |     | Symbol   | logFC | adj.P.value |
|----|-----------|-------|-------------|----|----------|-------|-------------|-----|----------|-------|-------------|
| 1  | IGJ       | -4.93 | 0.0036      | 37 | SULF1    | -2.82 | 0.0136      | 73  | CD248    | -2.35 | 0.0344      |
| 2  | DCN       | -4.80 | 0.0036      | 38 | TIMP1    | -2.38 | 0.0136      | 74  | MFAP5    | -2.77 | 0.0345      |
| 3  | CCL19     | -4.08 | 0.0059      | 39 | BGN      | -2.71 | 0.0141      | 75  | GIMAP5   | -2.08 | 0.0377      |
| 4  | IL7R      | -3.71 | 0.0066      | 40 | SPARCL1  | -3.17 | 0.0147      | 76  | PDGFRB   | -1.93 | 0.0400      |
| 5  | LUM       | -4.71 | 0.0066      | 41 | IGHA2    | -2.58 | 0.0155      | 77  | CRISPLD2 | -2.51 | 0.0410      |
| 6  | MMP2      | -3.71 | 0.0066      | 42 | MXRA5    | -2.63 | 0.0155      | 78  | PIM2     | -1.76 | 0.0425      |
| 7  | COL1A1    | -3.54 | 0.0079      | 43 | IGK@     | -3.68 | 0.0164      | 79  | CD28     | -2.05 | 0.0425      |
| 8  | COL6A3    | -3.59 | 0.0079      | 44 | CILP     | -2.51 | 0.0173      | 80  | COL5A2   | -2.07 | 0.0427      |
| 9  | SFRP2     | -4.18 | 0.0079      | 45 | GPR183   | -2.26 | 0.0179      | 81  | CCR7     | -2.06 | 0.0431      |
| 10 | IGLJ3     | -3.59 | 0.0080      | 46 | SERPINE1 | -2.82 | 0.0184      | 82  | IGF2     | -3.20 | 0.0439      |
| 11 | IGHA1     | -3.49 | 0.0080      | 47 | FAM46C   | -2.09 | 0.0185      | 83  | IGF1     | -2.93 | 0.0439      |
| 12 | CDH11     | -3.12 | 0.0089      | 48 | THY1     | -3.00 | 0.0185      | 84  | CXCR4    | -2.12 | 0.0442      |
| 13 | IGLV6-57  | -2.91 | 0.0089      | 49 | IGFBP4   | -2.43 | 0.0187      | 85  | PRRX1    | -2.14 | 0.0443      |
| 14 | IGKV1-5   | -3.59 | 0.0094      | 50 | IGK@     | -2.91 | 0.0187      | 86  | LRP1     | -2.54 | 0.0469      |
| 15 | VCAN      | -3.21 | 0.0096      | 51 | COL12A1  | -2.84 | 0.0215      | 87  | IGK@     | -3.19 | 0.0477      |
| 16 | COL1A2    | -3.66 | 0.0101      | 52 | PECAM1   | -2.48 | 0.0215      | 88  | LTBP2    | -1.79 | 0.0479      |
| 17 | LOC652493 | -2.95 | 0.0101      | 53 | SERPINF1 | -2.98 | 0.0222      | 89  | SPARC    | -2.66 | 0.0482      |
| 18 | DPT       | -2.94 | 0.0117      | 54 | APOD     | -2.39 | 0.0222      | 90  | F2R      | -1.79 | 0.0482      |
| 19 | CTSK      | -3.26 | 0.0124      | 55 | PCOLCE   | -2.33 | 0.0236      | 91  | TAGLN    | -2.31 | 0.0482      |
| 20 | POSTN     | -3.41 | 0.0124      | 56 | IGKC     | -2.83 | 0.0237      | 92  | MRC1     | -2.43 | 0.0482      |
| 21 | FBN1      | -3.15 | 0.0124      | 57 | IGHA1    | -2.77 | 0.0237      | 93  | MRC1     | -2.43 | 0.0482      |
| 22 | IGKC      | -2.87 | 0.0124      | 58 | F13A1    | -3.19 | 0.0237      | 94  | FAP      | -2.11 | 0.0482      |
| 23 | ENPP2     | -2.39 | 0.0124      | 59 | SELPLG   | -2.17 | 0.0246      | 95  | FYN      | -2.18 | 0.0484      |
| 24 | IGHV4-59  | -4.28 | 0.0124      | 60 | ACTA2    | -2.92 | 0.0255      | 96  | TCF4     | -2.18 | 0.0489      |
| 25 | LEF1      | -2.29 | 0.0124      | 61 | PRDM1    | -2.60 | 0.0255      | 97  | SELL     | -2.41 | 0.0489      |
| 26 | AEBP1     | -2.71 | 0.0124      | 62 | IGHM     | -3.49 | 0.0283      | 98  | THBS2    | -2.25 | 0.0489      |
| 27 | CCL18     | -2.99 | 0.0124      | 63 | LAMA4    | -2.29 | 0.0295      | 99  | SLCO2B1  | -2.15 | 0.0489      |
| 28 | CXCL12    | -3.15 | 0.0128      | 64 | CORO1A   | -2.08 | 0.0295      | 100 | TSC22D3  | -2.11 | 0.0489      |
| 29 | SFRP4     | -3.59 | 0.0133      | 65 | GZMK     | -2.99 | 0.0300      | 101 | FLI1     | -1.84 | 0.0489      |
| 30 | TIMP3     | -3.09 | 0.0136      | 66 | CYTIP    | -2.86 | 0.0300      | 102 | DUSP1    | -2.22 | 0.0493      |
| 31 | CCDC80    | -3.65 | 0.0136      | 67 | CFH      | -2.36 | 0.0305      | 103 | CD4      | -1.96 | 0.0494      |
| 32 | SLC40A1   | -2.46 | 0.0136      | 68 | PLAC8    | -2.04 | 0.0307      | 104 | S1PR1    | -1.54 | 0.0494      |
| 33 | COL3A1    | -3.01 | 0.0136      | 69 | IGKC     | -2.96 | 0.0307      | 105 | ITK      | -2.05 | 0.0494      |
| 34 | IGHD      | -4.16 | 0.0136      | 70 | WIPF1    | -2.20 | 0.0328      | 106 | CD37     | -2.11 | 0.0494      |
| 35 | RARRES2   | -2.23 | 0.0136      | 71 | TIMP3    | -2.23 | 0.0332      | 107 | MMP9     | -1.86 | 0.0494      |
| 36 | PKD4      | -3.61 | 0.0136      | 72 | OLFML2B  | -2.18 | 0.0336      |     |          |       |             |
