# Supplementary material for: Prognostic stromal gene signatures in breast cancer
Source: PubMed Central journal article supplement (PMC4360948; doi:10.1186/s13058-015-0530-2), 2015-02-21
Supplement: 13058_2015_530_MOESM6_ESM.pdf [file 13058_2015_530_MOESM6_ESM.pdf]

**Supplementary Table S5.** Genes enriched in cancer cell compartment, identified using the limma package in R. The magnitude of enrichment is indicated by the the difference in log<sub>2</sub> expression (logFC).

|    | Symbol    | logFC | adj.P.value |
|----|-----------|-------|-------------|
| 1  | DSG2      | 2.45  | 0.0124      |
| 2  | RAB25     | 2.36  | 0.0136      |
| 3  | MAL2      | 2.21  | 0.0136      |
| 4  | ELF5      | 2.26  | 0.0136      |
| 5  | VTCN1     | 2.34  | 0.0187      |
| 6  | DSP       | 2.15  | 0.0215      |
| 7  | IRF6      | 1.95  | 0.0215      |
| 8  | LOC151009 | 1.98  | 0.0219      |
| 9  | PEG10     | 1.93  | 0.0237      |
| 10 | CD24      | 2.12  | 0.0246      |
| 11 | PROM1     | 2.73  | 0.0280      |
| 12 | ITGB8     | 2.39  | 0.0288      |
| 13 | EHF       | 2.28  | 0.0295      |
| 14 | KRT7      | 1.93  | 0.0295      |
| 15 | MUC5B     | 1.92  | 0.0300      |
| 16 | GLYATL2   | 2.27  | 0.0303      |

|    | Symbol   | logFC | adj.P.value |
|----|----------|-------|-------------|
| 17 | ELF3     | 1.78  | 0.0307      |
| 18 | MPPED2   | 2.21  | 0.0307      |
| 19 | MUC16    | 2.03  | 0.0327      |
| 20 | BAIAP2L1 | 1.77  | 0.0328      |
| 21 | PFN2     | 1.77  | 0.0344      |
| 22 | ANLN     | 1.85  | 0.0344      |
| 23 | DSC2     | 1.67  | 0.0377      |
| 24 | TM4SF1   | 1.96  | 0.0390      |
| 25 | FRMD3    | 1.79  | 0.0390      |
| 26 | SORBS2   | 1.94  | 0.0409      |
| 27 | ESRP1    | 2.50  | 0.0410      |
| 28 | PHGDH    | 1.70  | 0.0414      |
| 29 | PRSS8    | 2.10  | 0.0425      |
| 30 | MYO5B    | 1.87  | 0.0443      |
| 31 | TRPS1    | 1.94  | 0.0456      |
| 32 | SERTAD4  | 1.84  | 0.0462      |

|    | Symbol    | logFC | adj.P.value |
|----|-----------|-------|-------------|
| 33 | CLDN7     | 1.61  | 0.0474      |
| 34 | AP1M2     | 1.71  | 0.0477      |
| 35 | MOCOS     | 1.61  | 0.0477      |
| 36 | CLDN4     | 1.73  | 0.0477      |
| 37 | CKS1B     | 1.81  | 0.0484      |
| 38 | CKS1B     | 1.77  | 0.0489      |
| 39 | SERPINA3  | 1.78  | 0.0493      |
| 40 | HIST1H2BK | 1.67  | 0.0493      |
| 41 | MYO6      | 1.74  | 0.0493      |
| 42 | CHPT1     | 1.61  | 0.0494      |
| 43 | UBE2T     | 1.60  | 0.0494      |
| 44 | SLC7A5    | 1.55  | 0.0494      |
| 45 | PTPLB     | 1.69  | 0.0494      |
| 46 | GABRP     | 2.15  | 0.0494      |
| 47 | GPR56     | 1.73  | 0.0499      |
| 48 | MPZL2     | 1.95  | 0.0499      |
