# Supplementary material for: Prognostic stromal gene signatures in breast cancer
Source: PubMed Central journal article supplement (PMC4360948; doi:10.1186/s13058-015-0530-2), 2015-02-21
Supplement: 13058_2015_530_MOESM8_ESM.pdf [file 13058_2015_530_MOESM8_ESM.pdf]

## Supplementary Figure S3.

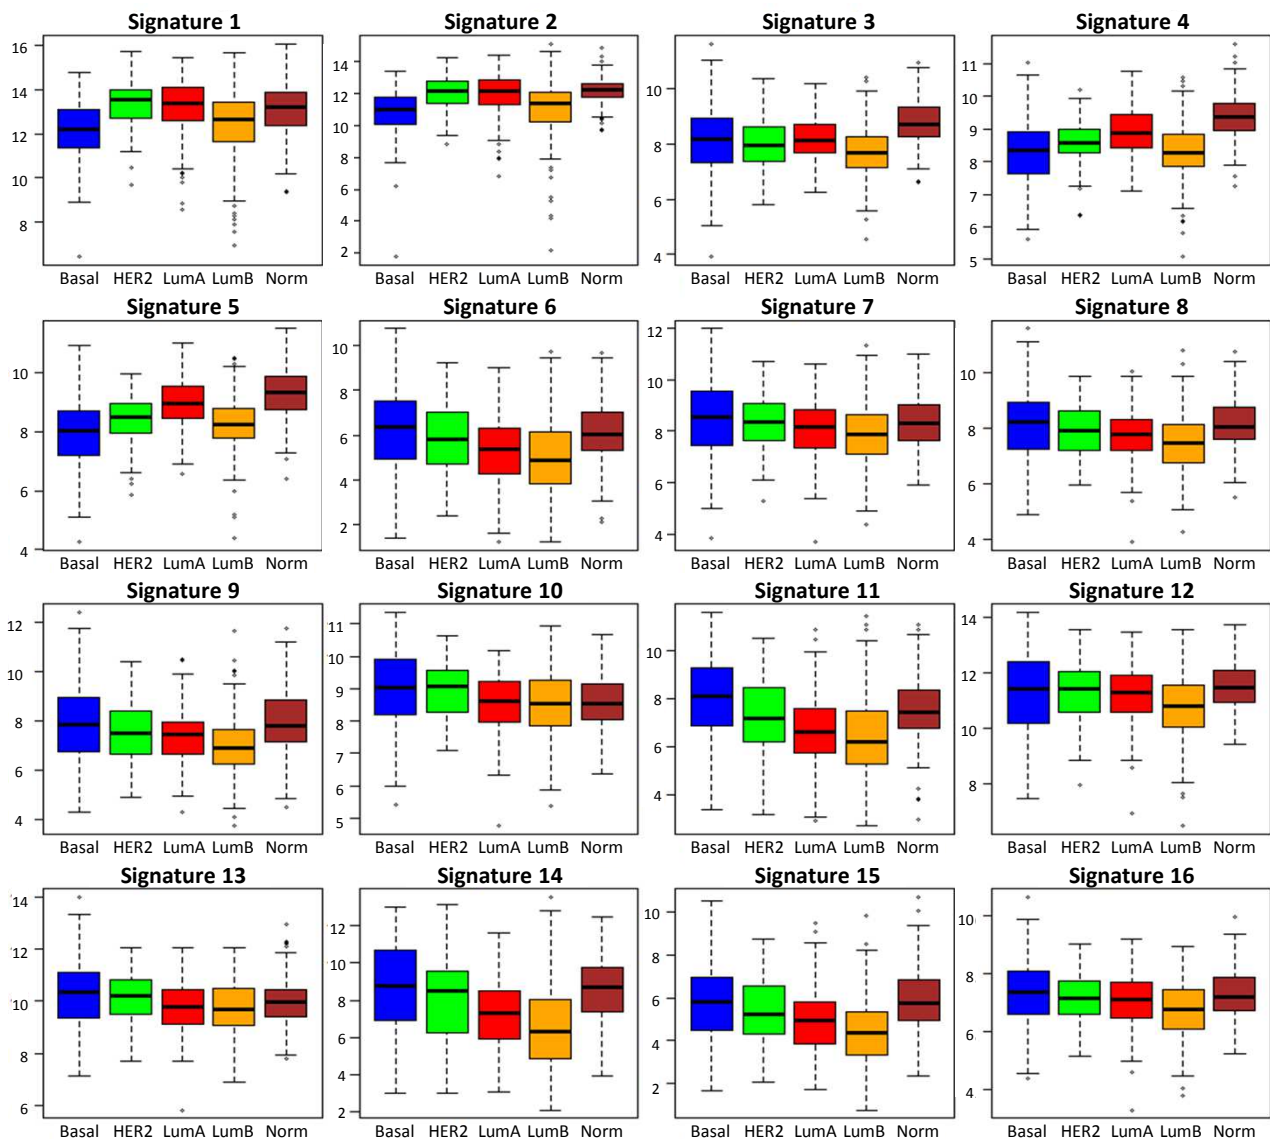

**Expression levels of gene signatures in breast cancer tumors.** The mean of the log2 expression levels of the genes in each signature were calculated for 982 breast cancers using data from the TCGA project. The aggregated values of each signature is shown for the indicated breast cancer subgroups.
